# Supplementary material for: Position and orientation of the westerly jet determined Holocene rainfall patterns in China
Source: Springer Nature journal article supplement (doi:10.1038/s41467-019-09866-8), 2019-05-30

Supplementary Material

Herzschuh et al., 2019

**Position and orientation of the westerly jet determined Holocene rainfall patterns in China**

Nature Communications

**Supplementary Tables**

**Supplementary Tab. 1 Summary statistics for canonical correspondence analyses for the whole dataset from China and Mongolia (Cao et al., 2014).**

$P_{ann}$  – annual precipitation,  $Mt_{wa}$  – mean temperature of the warmest month;  $Mt_{co}$  – mean temperature of the coldest month;  $T_{ann}$  mean annual temperature,  $P_{amjjas}$  – precipitation between March and September,  $P_{amjjas}$  – precipitation between June and August. Results indicate that  $P_{ann}$  explains most variance in the modern pollen dataset. Neither temperature nor seasonal precipitation explains more variance.

| Climatic variables | VIF                  | VIF              | $\lambda_1/\lambda_2$ | Climatic variables as sole predictor |         | Marginal contribution based on climatic variables |         |
|--------------------|----------------------|------------------|-----------------------|--------------------------------------|---------|---------------------------------------------------|---------|
|                    | (without $T_{ann}$ ) | (add $T_{ann}$ ) |                       | Explained variance (%)               | P-value | Explained variance (%)                            | P-value |
| $P_{ann}$          | 3.8                  | 3.8              | 1.58                  | 4.9                                  | 0.005   | 1.50                                              | 0.005   |
| $Mt_{co}$          | 4.3                  | 221.7            | 1.36                  | 4.2                                  | 0.005   | 0.67                                              | 0.005   |
| $Mt_{wa}$          | 1.5                  | 116.6            | 0.61                  | 2.7                                  | 0.005   | 1.30                                              | 0.005   |
| $T_{ann}$          | -                    | 520.4            | -                     | -                                    | -       | -                                                 | -       |
| $P_{amjjas}$       | -                    | -                | 1.50                  | 4.9                                  | 0.005   | -                                                 | -       |
| $P_{jja}$          | -                    | -                | 1.30                  | 4.4                                  | 0.005   | -                                                 | -       |

Cao, X., Herzschuh, U., Telford, R.J., Ni, J. A modern pollen-climate dataset from China and Mongolia: assessing its potential for climate reconstruction. *Review of Palaeobotany and Palynology* 211, 87-96 (2014).

**Supplementary Tab. 2 Summary statistics for canonical correspondence analyses for the southern China dataset <30°N** (Cao et al., 2014).  $P_{ann}$  – annual precipitation,  $Mt_{wa}$  – mean temperature of the warmest month;  $Mt_{co}$  – mean temperature of the coldest month;  $T_{ann}$  mean annual temperature. Results indicate that  $P_{ann}$  explains most variance in the modern pollen dataset. Neither temperature nor seasonal precipitation explains more variance. Results indicate that even in the southern part of China precipitation is the variable that explains most variance in the modern pollen dataset.

| Climatic variables | VIF                  | VIF              | $\lambda_1/\lambda_2$ | Climatic variables as sole predictor |         | Marginal contribution based on climatic variables |         |
|--------------------|----------------------|------------------|-----------------------|--------------------------------------|---------|---------------------------------------------------|---------|
|                    | (without $T_{ann}$ ) | (add $T_{ann}$ ) |                       | Explained variance (%)               | P-value | Explained variance (%)                            | P-value |
| $P_{ann}$          | 2.5                  | 2.6              | 0.89                  | 4.5                                  | 0.001   | 1.82                                              | 0.001   |
| $Mt_{co}$          | 5.0                  | 400.1            | 0.83                  | 4.1                                  | 0.001   | 1.45                                              | 0.001   |
| $Mt_{wa}$          | 4.5                  | 342.5            | 0.80                  | 4.4                                  | 0.001   | 1.50                                              | 0.001   |
| $T_{ann}$          | -                    | 1355.9           | -                     | -                                    | -       | -                                                 | -       |

**Supplementary Tab. 3. Supplementary information for each pollen record.** We assessed the age-model reliability (age score) and pollen data quality (data score) of each record to be high, intermediate, or low. An age-model was considered highly reliable if it had more than 3 reliable dates within the 10–2 cal ka BP interval, and was considered to be of low reliability if it had only one reliable date, or no dating at all, within that interval. The data quality was considered to be high if it possessed a complete pollen assemblage and original pollen data. The component (Comp) means the selected component of the WA-PLS model;  $r^2$  is the coefficient of determination between observed and predicted environmental values; RMSEP is the root mean square error of prediction; RMSEP percentage means the RMSEP as a percentage of the modern annual precipitation gradient range ( $P_{ann}$  gradient); Sig. is the p-value of the statistical significance test of reconstruction (Telford & Birks, 2011).

| Site information |                       |        |       |      |                | Quality of pollen data |               |                     | Reliability of reconstruction |                  |       |       |       |                         | Reference |                           |
|------------------|-----------------------|--------|-------|------|----------------|------------------------|---------------|---------------------|-------------------------------|------------------|-------|-------|-------|-------------------------|-----------|---------------------------|
| ID               | Site                  | Long.  | Lat.  | Alt. | Modern<br>Pann | Age<br>score           | Data<br>score | Available<br>number | No. of<br>Sample              | Pann<br>gradient | Comp. | $r^2$ | RMSEP | RMSEP<br>percentag<br>e |           | Sig.                      |
| 1                | Achit Nur Lake        | 90.60  | 49.50 | 1435 | 273            | 2                      | 2             | 11                  | 292                           | 60-541           | 2     | 0.67  | 80    | 16.67                   | 0.01      | Gunin et al., 1999        |
| 4                | Akkol Lake            | 89.63  | 50.25 | 2204 | 411            | 3                      | 3             | 44                  | 283                           | 60-541           | 2     | 0.67  | 81    | 16.84                   | 0.04      | Blyakharchuk et al., 2007 |
| 7                | Ayongwama Co          | 98.20  | 34.83 | 4220 | 357            | 2                      | 1             | 17                  | 944                           | 35-1069          | 1     | 0.79  | 115   | 11.14                   | 0.04      | Cheng et al., 2004        |
| 10               | Baikal Lake           | 105.87 | 52.08 | 130  | 2401           | 3                      | 3             | 29                  | 164                           | 93-378           | 1     | 0.47  | 49    | 17.05                   | 0.01      | Demske et al., 2005       |
| 16               | Barkol Lake           | 92.80  | 43.62 | 1575 | 163            | 3                      | 2             | 85                  | 471                           | 35-541           | 1     | 0.63  | 90    | 17.84                   | 0.06      | Tao et al., 2009          |
| 17               | Bayanchagan Lake      | 115.21 | 41.65 | 1355 | 389            | 3                      | 2             | 30                  | 584                           | 111-864          | 1     | 0.56  | 115   | 15.24                   | 0.25      | Jiang et al., 2006        |
| 22               | Bosten Lake           | 86.55  | 41.97 | 1050 | 74             | 3                      | 3             | 18                  | 296                           | 47-541           | 1     | 0.68  | 91    | 18.48                   | 0.95      | Xu, 1998                  |
| 24               | Bunan Lake            | 90.83  | 35.95 | 4876 | 217            | 1                      | 2             | 4                   | 697                           | 40-764           | 1     | 0.66  | 94    | 12.98                   | 0.16      | Shan et al., 1996         |
| 28               | Chaiwopu Lake         | 87.78  | 43.55 | 1100 | 223            | 1                      | 2             | 6                   | 254                           | 35-541           | 1     | 0.70  | 89    | 17.64                   | 0.71      | Li and Yan, 1990          |
| 29               | Changjiang River_1997 | 121.38 | 31.62 | 2    | 1109           | 3                      | 3             | 9                   | 249                           | 488-1913         | 2     | 0.81  | 185   | 12.97                   | 0.53      | Yi et al., 2003           |
| 30               | Changjiang River_1998 | 120.23 | 32.25 | 6    | 1059           | 3                      | 3             | 44                  | 356                           | 476-1913         | 2     | 0.81  | 178   | 12.42                   | 0.74      | Yi et al., 2003           |
| 41               | Daba Nur Lake         | 98.79  | 48.20 | 2465 | 365            | 3                      | 2             | 12                  | 309                           | 35-541           | 1     | 0.67  | 78    | 15.39                   | 0.55      | Gunin et al., 1999        |
| 42               | Dabsan Lake           | 95.50  | 37.10 | 2675 | 58             | 2                      | 2             | 4                   | 931                           | 35-1062          | 1     | 0.68  | 115   | 11.15                   | 0.64      | Du and Kong, 1986         |
| 45               | Dahaizi Lake          | 102.67 | 27.83 | 3660 | 1069           | 3                      | 2             | 17                  | 654                           | 312-1838         | 1     | 0.78  | 180   | 11.81                   | 0.59      | Li and Liu, 1988          |
| 46               | Dahu Lake             | 115.03 | 24.25 | 250  | 1780           | 3                      | 2             | 15                  | 576                           | 1020-2091        | 2     | 0.60  | 195   | 18.20                   | 0.37      | Zhou et al., 2004         |
| 47               | Daihai Lake_2004      | 112.67 | 40.58 | 1220 | 376            | 3                      | 3             | 192                 | 643                           | 35-1129          | 1     | 0.62  | 117   | 10.67                   | 0.05      | Xiao et al., 2004         |
| 49               | Dajiu Lake            | 110.67 | 31.75 | 1700 | 1130           | 3                      | 2             | 25                  | 668                           | 144-2011         | 1     | 0.81  | 213   | 11.39                   | 0.01      | Liu H.P. et al., 2001     |
| 50               | Dalai Nur Lake        | 116.58 | 43.28 | 1200 | 349            | 1                      | 2             | 3                   | 591                           | 111-1006         | 2     | 0.66  | 102   | 11.43                   | 0.2       | Li et al., 1990           |
| 52               | Daluoba               | 88.20  | 47.83 | 2020 | 209            | 1                      | 2             | 5                   | 252                           | 60-541           | 2     | 0.70  | 81    | 16.90                   | 0.08      | Yan and Xu, 1992          |
| 58               | Dengjiacun            | 113.65 | 34.47 | 133  | 661            | 3                      | 1             | 9                   | 615                           | 144-1857         | 2     | 0.83  | 159   | 9.29                    | 0.93      | Zhang et al., 2007        |
| 61               | Dingnan               | 115.03 | 24.75 | 274  | 1683           | 3                      | 2             | 13                  | 579                           | 1020-2091        | 2     | 0.61  | 195   | 18.17                   | 0.05      | Dodson et al., 2006       |
| 64               | Dongganchi            | 115.78 | 39.53 | 49   | 509            | 3                      | 3             | 42                  | 573                           | 111-1325         | 1     | 0.80  | 115   | 9.46                    | 0.4       | Zhang et al., 1997        |

|     |                      |        |       |      |      |   |   |     |               |   |      |     |       |      |                           |
|-----|----------------------|--------|-------|------|------|---|---|-----|---------------|---|------|-----|-------|------|---------------------------|
| 66  | Dood Nur Lake        | 99.38  | 51.33 | 1538 | 334  | 2 | 2 | 8   | 187 37-378    | 1 | 0.44 | 57  | 16.79 | 0.01 | Gunin et al., 1999        |
| 68  | Dunde                | 96.40  | 38.10 | 5325 | 339  | 3 | 3 | 24  | 944 35-872    | 1 | 0.67 | 111 | 13.25 | 0.66 | Liu et al., 1998          |
| 69  | Ebinur Lake          | 82.45  | 44.55 | 212  | 174  | 3 | 2 | 7   | 235 53-541    | 2 | 0.76 | 81  | 16.70 | 0.01 | Wen and Qiao, 1990        |
| 71  | Erhai Lake           | 100.20 | 25.77 | 1974 | 785  | 3 | 1 | 40  | 462 403-1766  | 1 | 0.81 | 152 | 11.14 | 0.74 | Zhou et al., 2003         |
| 72  | Erhailongwan Lake    | 126.37 | 42.30 | 724  | 813  | 3 | 2 | 8   | 373 220-1006  | 1 | 0.60 | 94  | 11.94 | 0.47 | Liu et al., 2008          |
| 78  | Ganhai Lake          | 112.19 | 38.89 | 1854 | 505  | 3 | 3 | 21  | 714 40-1348   | 2 | 0.81 | 110 | 8.44  | 0.16 | Meng et al., 2007         |
| 81  | Gladkoye Bog         | 83.33  | 55.00 | 80   | 458  | 3 | 3 | 45  | 45 96-271     | 1 | 0.00 | 35  | 19.80 | 0.68 | Firsov et al., 1982       |
| 82  | Gounong Co           | 92.15  | 34.63 | 4670 | 274  | 3 | 3 | 31  | 722 47-872    | 1 | 0.66 | 108 | 13.15 | 0.02 | Shan et al., 1996         |
| 83  | Grusha Lake          | 89.42  | 50.38 | 2413 | 336  | 3 | 3 | 13  | 270 60-541    | 2 | 0.68 | 82  | 16.99 | 0.04 | Blyakharchuk et al., 2007 |
| 84  | Guangfulin           | 121.19 | 31.06 | 4    | 1179 | 2 | 1 | 35  | 296 490-1913  | 2 | 0.80 | 177 | 12.42 | 0.59 | Atahan et al., 2008       |
| 87  | Gucheng Lake         | 118.90 | 31.28 | 6    | 1273 | 2 | 3 | 153 | 371 476-2089  | 2 | 0.81 | 197 | 12.21 | 0.87 | Yang et al., 1996         |
| 88  | Gun Nur Lake         | 106.60 | 50.25 | 600  | 377  | 3 | 3 | 21  | 252 35-402    | 1 | 0.49 | 57  | 15.64 | 0.1  | Gunin et al., 1999        |
| 91  | Halali               | 99.78  | 36.72 | 3220 | 360  | 3 | 2 | 2   | 853 35-1062   | 1 | 0.74 | 116 | 11.30 | 1    | Chen F.H. et al., 1991    |
| 95  | Haoluku Lake         | 116.76 | 42.96 | 1295 | 382  | 2 | 3 | 24  | 595 111-1006  | 2 | 0.66 | 102 | 11.42 | 0.87 | Wang et al., 2001         |
| 99  | Hemudu               | 121.35 | 29.97 | 6    | 1412 | 3 | 3 | 23  | 244 537-2068  | 2 | 0.76 | 180 | 11.74 | 0.36 | Li et al., 2009           |
| 104 | Hongyuanbai River    | 102.53 | 32.80 | 3500 | 772  | 3 | 3 | 33  | 935 40-1456   | 2 | 0.85 | 122 | 8.59  | 0.06 | Wang, 1987                |
| 107 | Huangjiapu           | 115.15 | 40.57 | 500  | 376  | 1 | 1 | 16  | 541 111-1051  | 1 | 0.62 | 117 | 12.42 | 0.73 | Sun et al., 2001          |
| 108 | Huangsha             | 113.23 | 23.13 | 40   | 1822 | 2 | 2 | 16  | 541 1016-2091 | 2 | 0.59 | 193 | 17.96 | 0.83 | Li, 1991                  |
| 111 | Huguangyan Maar Lake | 110.28 | 21.15 | 88   | 1690 | 3 | 3 | 4   | 429 892-2091  | 1 | 0.50 | 201 | 16.76 | 0.59 | Lv et al., 2003           |
| 113 | Hulun Nur Lake_2006  | 117.51 | 49.13 | 545  | 284  | 3 | 2 | 103 | 427 111-710   | 1 | 0.49 | 93  | 15.49 | 0.77 | Wen et al., 2010          |
| 114 | Hurleg Lake          | 96.90  | 37.28 | 2817 | 117  | 3 | 3 | 43  | 857 35-1062   | 1 | 0.71 | 115 | 11.16 | 0.4  | Zhao Y. et al., 2007      |
| 119 | Jiangjunpaozi Lake   | 117.47 | 42.37 | 1490 | 480  | 2 | 1 | 8   | 566 111-1006  | 2 | 0.66 | 103 | 11.56 | 0.24 | Liu H.Y. et al., 2001     |
| 124 | Jiudaogou            | 96.65  | 40.50 | 2143 | 59   | 2 | 1 | 24  | 841 35-806    | 1 | 0.59 | 116 | 15.06 | 0.87 | Mao et al., 2007          |
| 126 | Juyan Lake           | 101.85 | 41.89 | 892  | 40   | 3 | 3 | 59  | 796 35-850    | 1 | 0.64 | 110 | 13.46 | 0.48 | Herzschuh et al., 2004    |
| 130 | Kendegelukol Lake    | 87.64  | 50.51 | 2050 | 348  | 3 | 3 | 25  | 247 60-541    | 2 | 0.71 | 81  | 16.91 | 0.02 | Blyakharchuk et al., 2004 |
| 134 | Kotokel Lake         | 108.12 | 52.78 | 458  | 348  | 3 | 2 | 58  | 210 111-492   | 1 | 0.77 | 46  | 12.02 | 0.91 | Tarasov et al., 2009      |
| 138 | Kucha Lake           | 97.24  | 34.01 | 4540 | 481  | 3 | 3 | 38  | 929 35-1091   | 1 | 0.78 | 118 | 11.21 | 0.1  | Herzschuh et al., 2009    |
| 139 | Kuhai Lake           | 99.31  | 35.52 | 4150 | 427  | 3 | 3 | 32  | 941 35-1069   | 1 | 0.79 | 114 | 11.02 | 0.51 | Wischniewski et al., 2011 |
| 144 | Liuzhouwan Lake      | 116.68 | 42.71 | 1365 | 398  | 2 | 2 | 14  | 594 111-1006  | 2 | 0.65 | 104 | 11.58 | 0.21 | Wang et al., 2001         |
| 146 | Longquan Lake        | 112.24 | 31.08 | 80   | 990  | 2 | 2 | 21  | 667 179-2091  | 2 | 0.86 | 211 | 11.03 | 0.73 | Liu, 1991                 |
| 147 | Lop Nur_1983         | 90.25  | 40.33 | 800  | 17   | 1 | 2 | 7   | 530 35-541    | 1 | 0.63 | 90  | 17.83 | 0.1  | Yan et al., 1983          |
| 149 | Luanhaizi Lake       | 101.35 | 37.59 | 3200 | 485  | 3 | 3 | 9   | 763 35-1062   | 1 | 0.75 | 117 | 11.37 | 0.38 | Herzschuh et al., 2005    |
| 151 | Luojiang             | 121.36 | 29.98 | 4    | 1406 | 2 | 2 | 8   | 241 537-2011  | 2 | 0.75 | 178 | 12.08 | 0.1  | Atahan et al., 2008       |
| 153 | Manas Lake           | 85.92  | 45.83 | 251  | 125  | 3 | 3 | 31  | 230 47-541    | 2 | 0.74 | 81  | 16.39 | 0.31 | Sun et al., 1994          |
| 159 | Mengcun              | 117.12 | 38.05 | 5    | 552  | 2 | 3 | 19  | 617 111-1755  | 2 | 0.82 | 140 | 8.52  | 0.02 | Xu et al., 1993           |
| 162 | Naleng Co Lake       | 99.76  | 31.11 | 4200 | 705  | 3 | 3 | 69  | 922 51-1580   | 2 | 0.81 | 118 | 7.73  | 0.15 | Kramer et al., 2010       |
| 164 | Nantun               | 104.23 | 26.70 | 2197 | 979  | 3 | 1 | 40  | 564 441-1883  | 1 | 0.80 | 184 | 12.80 | 0.64 | Chen P.Y. et al., 1991    |

|     |                 |        |       |      |      |   |   |     |               |   |      |     |       |      |                           |
|-----|-----------------|--------|-------|------|------|---|---|-----|---------------|---|------|-----|-------|------|---------------------------|
| 167 | Niangziguan     | 113.88 | 37.95 | 500  | 519  | 1 | 2 | 5   | 638 104-1755  | 2 | 0.81 | 145 | 8.79  | 0.35 | Yang et al., 1999         |
| 179 | Qidong          | 121.70 | 31.90 | 10   | 1089 | 3 | 3 | 16  | 249 488-1880  | 2 | 0.82 | 182 | 13.06 | 0.23 | Liu et al., 1992          |
| 181 | Qinghai Lake    | 100.52 | 36.67 | 3200 | 421  | 3 | 3 | 114 | 816 35-1062   | 1 | 0.75 | 117 | 11.41 | 0.01 | Liu et al., 2002          |
| 183 | Qiumu           | 99.87  | 26.53 | 2200 | 916  | 1 | 3 | 10  | 568 338-1766  | 2 | 0.81 | 136 | 9.49  | 0.8  | Kong et al., 1986         |
| 184 | Qongjiamong Co  | 92.37  | 29.81 | 4980 | 556  | 3 | 3 | 35  | 577 51-1091   | 1 | 0.75 | 113 | 10.85 | 0.38 | Shen, 2003                |
| 185 | Ren Co          | 96.68  | 30.73 | 4450 | 653  | 3 | 2 | 21  | 844 51-1192   | 2 | 0.79 | 113 | 9.93  | 0.38 | Tang et al., 1999         |
| 189 | Sanyixiang      | 117.38 | 43.62 | 1541 | 417  | 2 | 1 | 6   | 582 111-1006  | 2 | 0.66 | 102 | 11.43 | 0.46 | Wang et al., 2005         |
| 190 | Selin Co        | 88.52  | 31.57 | 4530 | 299  | 3 | 3 | 30  | 364 51-743    | 1 | 0.75 | 84  | 12.18 | 0.11 | Sun et al., 1993          |
| 194 | Shayema Lake    | 102.22 | 28.58 | 2400 | 1034 | 3 | 3 | 53  | 730 150-1838  | 1 | 0.80 | 174 | 10.34 | 0.01 | Tang and Shen., 1996      |
| 195 | Shidicun        | 117.52 | 43.25 | 1077 | 390  | 2 | 2 | 4   | 580 111-1006  | 2 | 0.66 | 102 | 11.43 | 0.23 | Liu, 2002                 |
| 206 | Sujiawan        | 104.52 | 35.54 | 1950 | 426  | 3 | 3 | 32  | 861 35-1348   | 2 | 0.86 | 109 | 8.28  | 0.01 | Feng et al., 2006         |
| 219 | Tolmachevsko    | 84.00  | 55.00 | 110  | 715  | 3 | 3 | 18  | 49 89-271     | 1 | 0.04 | 41  | 22.67 | 0.75 | Volkov and Arkhipov, 1978 |
| 225 | Ulan Ul Lake    | 90.50  | 34.87 | 4854 | 249  | 1 | 2 | 8   | 604 47-764    | 1 | 0.67 | 93  | 12.94 | 0.23 | Shan et al., 1996         |
| 227 | Uzunkol Lake    | 87.11  | 50.48 | 1985 | 168  | 3 | 2 | 47  | 242 60-541    | 2 | 0.71 | 82  | 16.99 | 0.54 | Blyakharchuk et al., 2004 |
| 231 | Wangjiadian     | 114.67 | 36.16 | 67   | 532  | 3 | 3 | 54  | 622 137-1857  | 2 | 0.81 | 157 | 9.11  | 0.05 | Cao et al., 2010          |
| 237 | Wuqia Bridge    | 83.50  | 43.20 | 1320 | 410  | 1 | 2 | 4   | 250 53-541    | 2 | 0.75 | 82  | 16.76 | 0.66 | Lin, 1994                 |
| 238 | Wuying River    | 105.82 | 35.76 | 1400 | 435  | 3 | 3 | 32  | 892 35-1348   | 2 | 0.86 | 108 | 8.23  | 0.49 | Xia et al., 1998          |
| 244 | Xiehu Lake      | 121.00 | 37.38 | 0    | 711  | 2 | 2 | 22  | 415 208-1755  | 1 | 0.77 | 140 | 9.04  | 0.27 | Zhou et al., 2008         |
| 245 | Ximen Co Lake   | 101.47 | 33.38 | 4020 | 720  | 3 | 3 | 34  | 1003 35-1348  | 2 | 0.85 | 118 | 8.96  | 0.14 | Herzschuh et al., 2014    |
| 246 | Xinghua         | 119.88 | 32.71 | 2    | 1031 | 2 | 2 | 12  | 385 376-1869  | 2 | 0.83 | 173 | 11.61 | 0.06 | Shu et al., 2008          |
| 249 | Yamant Nur Lake | 102.60 | 49.90 | 1000 | 179  | 1 | 2 | 23  | 212 35-378    | 2 | 0.70 | 49  | 14.40 | 0.01 | Gunin et al., 1999        |
| 250 | Yangerzhuang    | 117.35 | 38.35 | 5    | 562  | 2 | 3 | 21  | 583 111-1755  | 2 | 0.83 | 133 | 8.12  | 0.01 | Xu et al., 1993           |
| 251 | Yanghu Lake     | 84.65  | 35.43 | 4778 | 189  | 2 | 2 | 10  | 386 51-680    | 1 | 0.67 | 88  | 14.05 | 0.14 | Zhao Z.M. et al., 2007    |
| 255 | Yangyuan_Xipu   | 114.22 | 40.12 | 912  | 389  | 2 | 1 | 2   | 549 53-1129   | 1 | 0.65 | 118 | 10.93 | 0.13 | Wang et al., 2003         |
| 258 | Yidun Lake      | 99.55  | 30.30 | 4470 | 726  | 2 | 2 | 15  | 902 51-1597   | 2 | 0.83 | 118 | 7.63  | 0.6  | Shen et al., 2006         |
| 268 | Zigetang Lake   | 90.90  | 32.00 | 4560 | 384  | 3 | 3 | 46  | 519 51-832    | 1 | 0.74 | 89  | 11.42 | 0.21 | Herzschuh et al., 2006    |
| 270 | Zoige_RH        | 103.35 | 33.95 | 3400 | 655  | 2 | 2 | 15  | 914 35-1348   | 2 | 0.86 | 119 | 9.04  | 0.47 | Tang and Shen, 1996       |
| 271 | Zoige_RM        | 102.35 | 33.95 | 3401 | 669  | 3 | 3 | 35  | 949 35-1348   | 2 | 0.85 | 118 | 9.01  | 0.26 | Shen et al., 1996         |
| 272 | Dongi Cona Lake | 98.50  | 35.50 | 4090 | 311  | 3 | 3 | 33  | 936 35-1069   | 1 | 0.79 | 114 | 11.00 | 0.48 | Wang et al., 2014         |
| 273 | Sumxi Lake      | 80.24  | 34.61 | 5059 | 68   | 3 | 3 | 70  | 92 53-433     | 1 | 0.75 | 57  | 14.89 | 0.23 | Campo and Gasse, 1993     |
| 274 | Bayan Nuur Lake | 93.00  | 50.00 | 932  | 172  | 3 | 3 | 40  | 311 37-541    | 2 | 0.66 | 80  | 15.86 | 0.11 | Krengel, 2000             |
| 278 | Sayram Lake     | 81.09  | 44.34 | 2125 | 254  | 3 | 3 | 96  | 224 53-541    | 2 | 0.76 | 81  | 16.50 | 0.68 | Jiang et al., 2013        |
| 279 | Qigai Nuur Lake | 109.50 | 39.50 | 1408 | 393  | 3 | 3 | 98  | 882 35-1348   | 2 | 0.80 | 112 | 8.52  | 0.01 | Sun and Feng, 2013        |
| 280 | Tiancai Lake    | 99.72  | 26.63 | 3898 | 970  | 3 | 3 | 154 | 569 338-1766  | 2 | 0.81 | 131 | 9.20  | 0.49 | Xiao et al., 2014         |
| 281 | Shaamar         | 105.20 | 50.20 | 650  | 291  | 3 | 3 | 16  | 225 35-378    | 2 | 0.56 | 53  | 15.52 | 0.18 | Ma et al., 2013           |
| 282 | Toushe_2013     | 120.88 | 23.82 | 1014 | 1424 | 3 | 3 | 72  | 341 1046-2091 | 2 | 0.70 | 159 | 15.24 | 0.51 | Li H.C. et al., 2013      |
| 284 | Gantang         | 119.03 | 26.77 | 1007 | 1900 | 3 | 3 | 85  | 464 691-2091  | 2 | 0.68 | 198 | 14.12 | 0.01 | Yue et al., 2012          |
| 285 | Dajiuhu_2013    | 110.00 | 31.49 | 1751 | 1130 | 3 | 3 | 27  | 737 138-2091  | 1 | 0.82 | 211 | 10.80 | 0.71 | Li J. et al., 2013        |

|     |                   |        |       |      |     |   |   |     |     |          |   |      |     |       |      |                      |
|-----|-------------------|--------|-------|------|-----|---|---|-----|-----|----------|---|------|-----|-------|------|----------------------|
| 287 | Gonghai Lake      | 112.23 | 38.90 | 1860 | 505 | 3 | 3 | 288 | 704 | 51-1348  | 2 | 0.81 | 111 | 8.56  | 0.44 | Chen et al., 2015    |
| 288 | Sihailongwan Lake | 126.60 | 42.28 | 797  | 775 | 3 | 3 | 118 | 366 | 226-1006 | 1 | 0.60 | 94  | 12.02 | 0.32 | Stebich et al., 2015 |
| 290 | Aibi Lake         | 82.83  | 45.02 | 200  | 95  | 3 | 2 | 51  | 216 | 53-541   | 2 | 0.76 | 82  | 16.74 | 0.6  | Wang et al., 2013    |
| 297 | Zoige_2011        | 102.63 | 33.45 | 3467 | 648 | 3 | 3 | 104 | 943 | 35-1348  | 2 | 0.85 | 119 | 9.08  | 0.25 | Zhao et al., 2011    |

## References Supplementary Tab. 1

Atahan, P., Itzstein-Davey, F., Taylor, D., Dodson, J., Qin, J., Zheng, H., Brooks, A., 2008. Holocene-aged sedimentary records of environmental changes and early agriculture in the lower Yangtze, China. *Quaternary Science Reviews*, 27, 556-570.

Blyakharchuk, T.A., Wright, H.E., Borodavko, P.S., van der Knaap, W.O., Ammann, B., 2007. Late Glacial and Holocene vegetational history of the Altai Mountains (southwestern Tuva Republic Siberia). *Palaeogeography, Palaeoclimatology, Palaeoecology* 245, 518-534.

Blyakharchuk, T.A., Wright, H.E., Borodavko, P.S., van der Knaap, W.O., Ammann, B., 2004. Late Glacial and Holocene vegetational changes on the Ulagan high-mountain plateau, Altai Mountains, southern Siberia. *Palaeogeography, Palaeoclimatology, Palaeoecology* 209, 259-279.

Campo, E.V., Gasse, F., 1993. Pollen- and diatom-inferred climatic and hydrological changes in Sumxi Co Basin (Western Tibet) since 13,000 yr B.P. *Quaternary Research* 39, 300–313.

Cao, X., Xu, Q., Jing, Z., Tang, J., Li, Y., Tian, F., 2010. Holocene climate change and human impacts implied from the pollen records in Anyang, central China. *Quaternary International* 227, 3-9.

Chen, F., Xu, Q., Chen, J., Birks, H.J.B., Liu, J., Zhang, S., Jin, L., An, C., Telford, R.J., Cao, X., Wang, Z., Zhang, X., Selvaraj, K., Lu, H., Li, Y., Zheng, Z., Wang, H., Zhou, A., Dong, G., Zhang, J., Huang, X., Bloemendal, J., Rao, Z., 2015. East Asian summer monsoon precipitation variability since the last deglaciation. *Scientific Reports* 5, 11186. doi: 10.1038/srep11186.

Chen, F.H., Wang, S.L., Zhang, W.X., Pan, B.T., 1991. The loess profile at south bank, climatic information and lake-level fluctuations of Qinghai Lake during the Holocene. *Scientia Geographica Sinica* 11, 76-85 (in Chinese with English abstract).

Chen, P.Y., Zhou, Q.Y., Lin, S.J., 1991. Palaeoenvironment from 15000 a B.P. to the present in Weining County, Guizhou: A study of Nantun peat-bed section. *Geology of Guizhou* 8, 141-152 (in Chinese with English abstract).

Cheng, J., Zhang, X.J., Tian, M.Z., Tang, D.X., Yu, W.Y., Yu, J.K., Qiao, G.B., Zan, L.H., 2004. Climate of the Holocene megathermal in the source area of the Yellow River, Northeast Tibet. *Geological Review* 50, 330-337 (in Chinese with English abstract).

Demske, D., Heumann, G., Granoszewski, W., Nita, M., Mamakowa, K., Tarasov, P.E., Oberhansli, H., 2005. Late glacial and Holocene vegetation and regional climate variability evidenced in high-resolution pollen records from Lake Baikal. *Global and Planetary Change* 46, 255-279.

Dodson, J.R., Hickson, S., Khoo, R., Li, X.Q., Toia, J., Zhou, W.J., 2006. Vegetation and environment history for the past 14 000 yrBP from Dingnan, Jiangxi Province, South China. *Journal of Integrative Plant Biology* 48, 1018-1027.

Du, N.Q., Kong, Z.C., 1986. Spore-pollen assemblages of Dabsan Lacustrine sediment CK1/81 and their geographical and ecological significances. In: Qinghai Institute of Salt Lakes, CAS (Ed.), *Geological Environmental Changes in Qaidam Basin, Qinghai Province in Late Cenozoic*. Science Press, Beijing, pp. 59-70 (in Chinese).

- Feng, Z.D., Tang, L.Y., Wang, H.B., Ma, Y.Z., Liu, K.-B., 2006. Holocene vegetation variations and the associated environmental changes in the western part of the Chinese Loess Plateau. *Palaeogeography, Palaeoclimatology, Palaeoecology* 241, 440-456.
- Firsov, L.V., Volkova, V.S., Levina, T.P., Nikolayeva, I.V., Orlova, L.A., Panychev, V.A., Volkov, I.A., 1982. The stratigraphy, geochronology, and standard spore-pollen diagram for Holocene peat, Gladkoye Bog, Novosibirsk. In: Arkhipov, S.A. (Ed.), *Problems of stratigraphy and paleogeography of the Pleistocene of Siberia*. Nauka, Novosibirsk. pp. 96-107 (in Russian).
- Gunin, P.D., Vostokova, E.A., Dorofeyuk, N.I., Tarasov, P.E., Black, C.C., 1999. *Vegetation Dynamics of Mongolia*. Kluwer Academic Publishers, London.
- Herzschuh, U., Borkowski, J., Schewe, J., Mischke, S., Tian, F., 2014. Moisture-advection feedback supports strong early-to-mid Holocene monsoon climate on the eastern Tibetan Plateau as inferred from a pollen-based reconstruction. *Palaeogeography Palaeoclimatology Palaeoecology* 402, 44-54.
- Herzschuh, U., Kramer, A., Mischke, S., Zhang, C.J., 2009. Quantitative climate and vegetation trends since the late glacial on the northeastern Tibetan Plateau deduced from Koucha Lake pollen spectra. *Quaternary Research*, 71, 162-171.
- Herzschuh, U., Tarasov, P., Wünnemann, B., Hartmann, K., 2004. Holocene vegetation and climate of the Alashan Plateau, NW China, reconstructed from Pollen data. *Palaeogeography, Palaeoclimatology, Palaeoecology* 211, 1-17.
- Herzschuh, U., Winter, K., Wünnemann, B., Li, S.J., 2006. A general cooling trend on the central Tibetan Plateau throughout the Holocene recorded by the Lake Zigetang pollen spectra. *Quaternary International* 154-155, 113-121.
- Herzschuh, U., Zhang, C.J., Mischke, S., Herzschuh, R., Mohammadi, F., Mingram, B., Kurschner, H., Riedel, F., 2005. A late Quaternary lake record from the Qilian Mountains (NW China): evolution of the primary production and the water depth reconstructed from macrofossil, pollen, biomarker, and isotope data. *Global and Planetary Change* 46, 361-379.
- Jiang, Q.F., Ji, J.F., Shen, J., Matsumoto, R., Tong, G.B., Qian, P., Ren, X.M., Yan, D.Z., 2013. Holocene vegetational and climatic variation in westerly-dominated areas of Central Asia inferred from the Sayram Lake in northern Xinjiang, China. *Science China Earth Sciences* 56, 339-353.
- Jiang, W.Y., Guo, Z.T., Sun, X.J., Wu, H.B., Chu, G.Q., Yuan, B.Y., Hatté, C., Guiot, J., 2006. Reconstruction of climate and vegetation changes of Lake Bayanchagan (Inner Mongolia): Holocene variability of the East Asian monsoon. *Quaternary Research* 65, 411-420.
- Kong, Z.C., Du, N.Q., Gao, X.L., Huang, X.G., Lin, L.R., 1986. Palynological analysis of the Qiumushan region in Jianchuan County of Holocene and its significance. In: *The Comprehensive Scientific Expedition to the Tibet Plateau, the Chinese Academy of Sciences (Ed.), Studies in Tibet Plateau, Special Issue of Hengduan Mountains Scientific Expedition (II)*. Beijing Science and Technology Press, Beijing, pp. 80-85 (in Chinese).
- Kramer, A., Herzschuh, U., Mischke, S., Zhang C.J., 2010. Holocene treeline shifts and monsoon variability in the Hengduan Mountains (southeastern Tibetan Plateau), implications from palynological investigations. *Palaeogeography, Palaeoclimatology, Palaeoecology* 286, 23-41.
- Krengel, M., 2000. Discourse on history of vegetation and climate in Mongolia-palynological report of sediment core Bayan Nuur I (NW-Mongolia). In: Walther, M., Janzen, J., Riedel, F., and Keupp, H. (eds). *State and dynamics of geosciences and human geography in Mongolia: extended abstracts of the international symposium (Berliner Geowissenschaftliche Abhandlungen)*. pp. 80-84, Berlin, Germany.

- Li, C.H., Tang, L.Y., Wan, H.W., Yao, S.C., Zhang, D.F., 2009. Vegetation and human activity in Yuyao (Zhejiang Province) inferred from the sporo-pollen record since the late Pleistocene. *Acta Micropalaeontologica Sinica* 26, 48-56 (in Chinese with English abstract).
- Li, H.C., Liew, P.M., Seki, O., Kuo, T.S., Kawamura, K., Wang, L.C., Lee, T.Q., 2013. Paleoclimate variability in central Taiwan during the past 30 KyrS reflected by pollen,  $\delta^{13}\text{C}_{\text{TOC}}$ , and n-alkane- $\delta\text{D}$  records in a peat sequence from Toushe Basin. *Journal of Asian Earth Sciences* 69, 166-176.
- Li, J., Zheng, Z., Huang, K., Yang, S., Chase, B., Valsecchi, V., Carré, M., Cheddadi, R., 2013. Vegetation changes during the past 40,000 years in Central China from a long fossil record. *Quaternary International* 310, 221-226.
- Li, R.Q., Zheng, L.M., Zhu, G.R., 1990. Lakes and Environmental Change in the Inner Mongolian Plateau. Beijing Normal University Press, Beijing (in Chinese).
- Li, S.J., Zheng, B.X., Jiao, K.Q., 1991. Preliminary research on lacustrine deposit and lake evolution on the south slope of the west Kunlun Mountains. *Scientia Geographica Sinica* 11, 306-314 (in Chinese with English abstract).
- Li, W.Y., Yan, S., 1990. Quaternary spore and pollen research in Chaiwopu Basin. In: Shi, Y.F., Wen, Q.Z., Qu, Y.G., et al. (Ed.), *The Quaternary Climo-Environment Changes and Hydrogeological Condition of Chaiwopu Basin In Xinjiang Region*. China Ocean Press, Beijing, pp. 164 (in Chinese).
- Li, X., Liu, J.L., 1988. Holocene vegetational and environmental changes at Mt. Luoji, Sichuan. *Acta Geographica Sinica* 43, 44-51 (in Chinese with English abstract).
- Lin, M.C., 1994. Spore-pollen analysis of Quaternary in Xinjiang Region. In: Wen, Q.Z. (Ed.), *Quaternary Geology and Environment of Xinjiang Region, China*. Agricultural Press of China, Beijing, pp. 68-94 (in Chinese).
- Liu, G.X., 1991. Late-Glacial and Postglacial vegetation and association environment in Jiangnan Plain. *Acta Botanica Sinica* 33, 581-588 (in Chinese with English abstract).
- Liu, H.P., Tang, X.C., Sun, D.H., Wang, K.F., 2001. Palynofloras of the Dajihu Basin in Shennongjia Mountains during the last 12.5ka. *Acta Micropalaeontologica Sinica* 18, 101-109 (in Chinese with English abstract).
- Liu, H.Y., Cui, H.T., Huang, Y.M., 2001. Detecting Holocene movements of the woodland-steppe ecotone in northern China using discriminant analysis. *Journal of Quaternary Science* 16, 237-244.
- Liu, K.B., Sun, S., Jiang, X.H., 1992. Environmental change in the Yangtze River Delta since 12000 years B.P. *Quaternary Research* 38, 32-35.
- Liu, K.B., Yao, Z.J., Thompson, L.G., 1998. A pollen record of Holocene climatic changes from the Dunde ice cap, Qinghai-Tibetan Plateau. *Geology* 26, 135-138.
- Liu, X.H., 2002. Study on Holocene environment of Keshiketeng County, Inner Mongolia (Master Thesis). China Geology University, Beijing (in Chinese with English abstract).
- Liu, X.Q., Shen, J., Wang, S.M., Yang, X.D., Tong, G.B. and Zhang, E.L., 2002. A 16000-year pollen record of Qinghai Lake and its paleoclimate and paleoenvironment. *Chinese Science Bulletin* 47, 1931-1936.
- Liu, Y.Y., Zhang, S.Q., Liu, J.Q., You, H.T., Han, J.T., 2008. Vegetation and environment history of Erlongwan Maar Lake during the late Pleistocene on pollen record. *Acta Micropalaeontologica Sinica* 25, 274-280 (in Chinese with English abstract).
- Lv, H.Y., Liu, J.Q., Chu, G.Q., Gu, Z.Y., Negendank, J., Schettler, G., Mingram, J., 2003. A study on pollen and environment in the Huguangyan Maar Lake since the last glaciation. *Acta Palaeontologica Sinica* 42, 284-291 (in Chinese with English abstract).



- Ma, Y., Liu, K.B., Feng, Z., Meng, H., Sang, Y., Wang, W., Zhang, H., 2013. Vegetation changes and associated climate variations during the past ~38,000 years reconstructed from the Shaamar eolian-paleosol section, northern Mongolia. *Quaternary International* 311, 25-35.
- Mao, H.L., Zhao, H., Lu, Y.C., Wang, C.M., Zhang, K.Q., Yang, Z.J., Liang, J.J., 2007. Pollen assemblages and environment evolution in Shule River alluvial fan oasis of Gansu. *Acta Geoscientica Sinica* 28, 528-534 (in Chinese with English abstract).
- Meng, X.M., Zhu, D.G., Shao, Z.G., Han, J.E., Yu, J., Meng, Q.W., Lv, R.P., Luo, P., 2007. Paleoclimatic and palaeoenvironmental evolution since Holocene in the Ningwu Area, Shanxi Province. *Acta Geologica Sinica* 81, 316-323 (in Chinese with English abstract).
- Shan, F.S., Kong, Z.C., Du, N.Q., 1996. Palaeovegetation and environmental changes. In: Li, B.Y. (Ed.), *Physical Environment of Hoh Xil Region, Qinghai*. Science Press, Beijing, pp. 197-206 (in Chinese).
- Shen, C.M., 2003. Millennial-scale variations and centennial-scale events in the southwest Asian Monsoon: Pollen evidence from Tibet (PhD Thesis). Louisiana State University, USA.
- Shen, C.M., Liu, K.B., Tang, L.Y., Overpeck, J.T., 2006. Quantitative relationships between modern pollen rain and climate in the Tibetan Plateau. *Review of Palaeobotany and Palynology* 140, 61-77.
- Shen, C.M., Tang, L.Y., Wang, S.M., 1996. Vegetation and climate during the past 22000 years in Zoige Region. *Acta Micropalaeontologica Sinica* 13, 401-406 (in Chinese with English abstract).
- Shu, Q., Xiao, J.Y., Zhang, M.X., Zhao, Z.J., Chen, Y., Li, J.J., 2008. Climate change in northern Jiangsu Basin since the last interglacial. *Geological Science and Technology Information* 27, 59-64 (in Chinese with English abstract).
- Stebich, M., Rehfeld, K., Schlütz, F., Tarasov, P.E., Liu, J., Mingram, J., 2015. Holocene vegetation and climate dynamics of NE China based on the pollen record from Sihailongwan Maar Lake. *Quaternary Science Reviews* 124, 275–289.
- Sun, A.Z., Feng, Z.D., 2013. Holocene climatic reconstructions from the fossil pollen record at Qigai Nuur in the southern Mongolian Plateau. *The Holocene* 23, 1391-1402.
- Sun, L.M., Xu, Q.H., Yang, X.L., Liang, W.D., Kong, Z.C., 2001. Vegetation and environmental changes in the Xuanhua Basin of Hebei Province since postglacial. *Journal of Geomechanics* 7, 303-308 (in Chinese with English abstract).
- Sun, X.J., Du, N.Q., Chen, Y.S., Gu, Z.Y., Liu, J.Q., Yuan, B.Y., 1993. Holocene Palynological Records in Lake Selincuo, Northern Xizang. *Acta Botanica Sinica* 35, 943-950 (in Chinese with English abstract).
- Sun, X.J., Du, N.Q., Weng, C.Y., Lin, R.F., Wei, K.Q., 1994. Paleovegetation and paleoenvironment of Manasi Lake, Xinjiang, N.W. China during the last 14 000 years. *Quaternary Sciences* 14, 239-248 (in Chinese with English abstract).
- Tang, L.Y., Shen, C.M., 1996. Holocene pollen records of The Qinghai-Xizang Plateau. *Acta Micropalaeontologica Sinica* 13, 407-422 (in Chinese with English abstract).
- Tang, L.Y., Shen, C.M., Liu, K.B., Overpeck, J.T., 1999. New high-resolution pollen records from two lakes in Xizang (Tibet). *Acta Botanica Sinica* 41, 896-902 (in Chinese with English abstract).
- Tao, S.C., An, C.B., Chen, F.H., Tang, L.Y., Lv, Y.B., Zheng, T.M., 2009. Holocene vegetation changes interpreted from pollen records in Balikun Lake, Xinjiang, China. *Acta Palaeontologica Sinica* 48, 194-199 (in Chinese with English abstract).

- Tarasov, P.E., Bezrukova, E.V., Krivonogov, S.K., 2009. Late glacial and Holocene changes in vegetation cover and climate in southern Siberia derived from a 15kyr long pollen record from Lake Kotokel. *Climate of the Past Discussions* 5, 127-151.
- Telford, R.J., Birks, H.J.B., 2011. A novel method for assessing the statistical significance of quantitative reconstructions inferred from biotic assemblages. *Quaternary Science Reviews* 30, 1272-1278.
- Volkov, I.A., Arkhipov, S.A., 1978. Quaternary deposits of the Novosibirsk Region. Joint Institute for Geology, Geophysics and Mineralogy, Siberia Branch, USSR Academy of Sciences, Novosibirsk (in Russian).
- Wang, H.Y., Liu, H.Y., Cui, H.T., Abrahamsen, N., 2001. Terminal Pleistocene/Holocene palaeoenvironmental changes revealed by mineral-magnetism measurements of lake sediments for Dali Nor area, southeastern Inner Mongolia Plateau, China. *Palaeogeography Palaeoclimatology Palaeoecology* 170, 115-132.
- Wang, M.H., 1987. The spore-pollen groups of peatland on Ruergai Plateau and palaeobotany and paleoclimate. *Scientia Geographica Sinica* 7, 147-155 (in Chinese with English abstract).
- Wang, W., Feng, Z., Ran, M., Zhang, C., 2013. Holocene climate and vegetation changes inferred from pollen records of Lake Aibi, northern Xinjiang, China: A potential contribution to understanding of Holocene climate pattern in East-central Asia. *Quaternary International* 311, 54-62.
- Wang, Y., Herzschuh, U., Shumilovskikh, L.S., Mischke, S., Birks, H.J.B., Wischniewski, J., Böhner, J., Schlütz, F., Lehmkuhl, F., Diekmann, B., Wünnemann, B., Zhang, C., 2014. Quantitative reconstruction of precipitation changes on the NE Tibetan Plateau since the Last Glacial Maximum – extending the concept of pollen source area to pollen-based climate reconstructions from large lakes. *Climate of the Past* 10, 21–39.
- Wang, Y., Wang, S.B., Jiang, F.C., Tong, G.B., 2003. Palynological Records in Xipu Section, Yangyuan. *Journal of Geomechanics* 9, 171-175 (in Chinese with English abstract).
- Wang, Y., Wang, S.B., Zhao, Z.Z., Qin, Y., Ma, Y.S., Sun, J.M., Sun, H.Y., Tian, M.Z., 2005. Vegetation and environmental changes in Hexiqten Qi of Inner Mongolia in the past 16 000 years. *Acta Geoscientica Sinica* 26, 449-453 (in Chinese with English abstract).
- Wen, Q.Z., Qiao, Y.L., 1990. Preliminary probe of climatic sequence in the last 13 000 years in Xinjiang Region. *Quaternary Sciences* 10, 363-371 (in Chinese with English abstract).
- Wen, R.L., Xiao, J.L., Chang, Z.G., Zhai, D.Y., Xu, Q.H., Li, Y.C., Itoh, S., 2010. Holocene precipitation and temperature variations in the East Asian monsoonal margin from pollen data from Hulun Lake in northeastern Inner Mongolia, China. *Boreas* 39, 262-272.
- Wischniewski, J., Mischke, S., Wang, Y., Herzschuh, U., 2011. Reconstructing climate variability on the northeastern Tibetan Plateau since the last Lateglacial – a multi-proxy, dual-site approach comparing terrestrial and aquatic signals. *Quaternary Science Reviews* 30, 82-97.
- Xia, D.S., Ma, Y.Z., Chen, F.H., Wang, J.M., 1998. High-resolution vegetation and climate variations in Longxi Loess Plateau during Holocene. *Journal of Lanzhou University (Natural Sciences)* 34, 119-127 (in Chinese with English abstract).
- Xiao, J.L., Xu, Q.H., Nakamura, T., Yang, X.L., Liang, W.D., Inouchif, Y., 2004. Holocene vegetation variation in the Daihai Lake region of north-central China: a direct indication of the Asian monsoon climatic history. *Quaternary Science Reviews* 23, 1669-1679.
- Xiao, X.Y., Haberle, S.G., Shen, J., Yang, X.D., Han, Y., Zhang, E.L., Wang, S.M., 2014. Latest Pleistocene and Holocene vegetation and climate history inferred from an alpine lacustrine record, northwestern Yunnan Province, southwestern China. *Quaternary Science Reviews* 86, 35-48.

- Xu, Q.H., Wu, C., Wang, Z.H., Tong, G.B., Wu, S.J., Zhang, J.P., Du, N.Q., Kong, Z.C., 1993. Approach to palaeo-environment in the west coast of Bohai Bay since 25000 a.B.P. *Acta Phytocologica et Geobotanica Sinica* 17, 20-32 (in Chinese with English abstract).
- Xu, Y.Q., 1998. The assemblage of Holocene spore pollen and its environment in Bosten Lake area, Xinjiang. *Arid Land Geography* 21, 43-49 (in Chinese with English abstract).
- Yan, F.H., Ye, Y.Y., Mai, X.S., 1983. The sporo-pollen assemblage in the Luo 4 drilling of Lop Lake in Uygur Autonomous Region of Xinjiang and its significance. *Seismology and Geology* 5, 75-80 (in Chinese with English abstract).
- Yan, S., Xu, Y.Q., 1992. The Holocene vegetation and environment in Daluoba Basin of Altay Mountains, Xinjiang. *Xinjiang Geology* 10, 279-284 (in Chinese with English abstract).
- Yang, X.D., Wang, S.M., Tong, G.B., 1996. Character of palynology and changes of monsoon climate over the last 10000 years in Gucheng Lake, Jiangsu Province. *Acta Botanica Sinica* 38, 576-581 (in Chinese with English abstract).
- Yang, X.L., Xu, Q.H., Zhao, H.P., 1999. Vegetation succession since last glacial in Taihang Mountains Area. *Geography and Territorial Research* 15, 81-88 (in Chinese with English abstract).
- Yi, S.H., Saito, Y., Zhao, Q.H., Wang, P.X., 2003. Vegetation and climate changes in the Changjiang (Yangtze River) Delta, China, during the past 13,000 years inferred from pollen records. *Quaternary Science Reviews* 22, 1501-1519.
- Yue, Y., Zheng, Z., Huang, K., Chevalier, M., Chase, B.M., Carré, M., Ledru, M.-P., Cheddadi, R., 2012. A continuous record of vegetation and climate change over the past 50,000 years in the Fujian Province of eastern subtropical China. *Palaeogeography, Palaeoclimatology, Palaeoecology* 365–366, 115-123.
- Zhang, J.H., Kong, Z.C., Du, N.Q., 1997. An analysis of different sedimentary environment influence on pollen deposit in Beijing. *Acta Sedimentologica Sinica* 15, 57-63 (in Chinese with English abstract).
- Zhang, Z.Y., Zhou, K.S., Yang, R.X., Zhang, S.L., Cai, Q.F., Lu, P., Hao, L.M., Wang, C., 2007. Environmental archaeology in the Shuangji River basin. *Quaternary Research* 27, 453-460 (in Chinese with English abstract).
- Zhao, Y., Yu, Z., Zhao, W., 2011. Holocene vegetation and climate histories in the eastern Tibetan Plateau: controls by insolation-driven temperature or monsoon-derived precipitation changes? *Quaternary Science Reviews* 30, 1173-1184.
- Zhao, Y., Yu, Z.C., Chen, F.H., Ito, E., Zhao, C., 2007. Holocene vegetation and climate history at Hurlig Lake in the Qaidam Basin, northwest China. *Review of Palaeobotany and Palynology* 145, 275-288.
- Zhao, Z.M., Liu, A.M., Peng, W., Ji, W.H., Li, R.S., Wang, Y.Z., Zhu, Y.T., 2007. Holocene environmental changes of northern Qinghai-Tibetan Plateau based on spore-pollen analysis. *Arid Land Geography* 30, 381-391 (in Chinese with English abstract).
- Zhou, J., Liu, D.Y., Zhuang, Z.Y., Wang, Z.Z., Liu, L.D., 2008. The Sediment layers and the records of the paleoenvironment in the Chaoyanggang Lagoon, Rongcheng City of Shandong Province since Holocene transgression. *Periodical of Ocean University of China* 38, 803-808 (in Chinese with English abstract).
- Zhou, J., Wang, S.M., Lv, J., 2003. Climatic and environmental changes from the sediment record of Erhai Lake over the past 10000 Years. *Journal of Lake Sciences* 15, 104-111 (in Chinese with English abstract).

Zhou, W.J., Yu, X.F., Jull, A.J.T., Burr, G., Xiao, J.Y., Lu, X.F., Xian, F., 2004. High-resolution evidence from southern China of an early Holocene optimum and a mid-Holocene dry event during the past 18,000 years. *Quaternary Research* 62, 39-48.

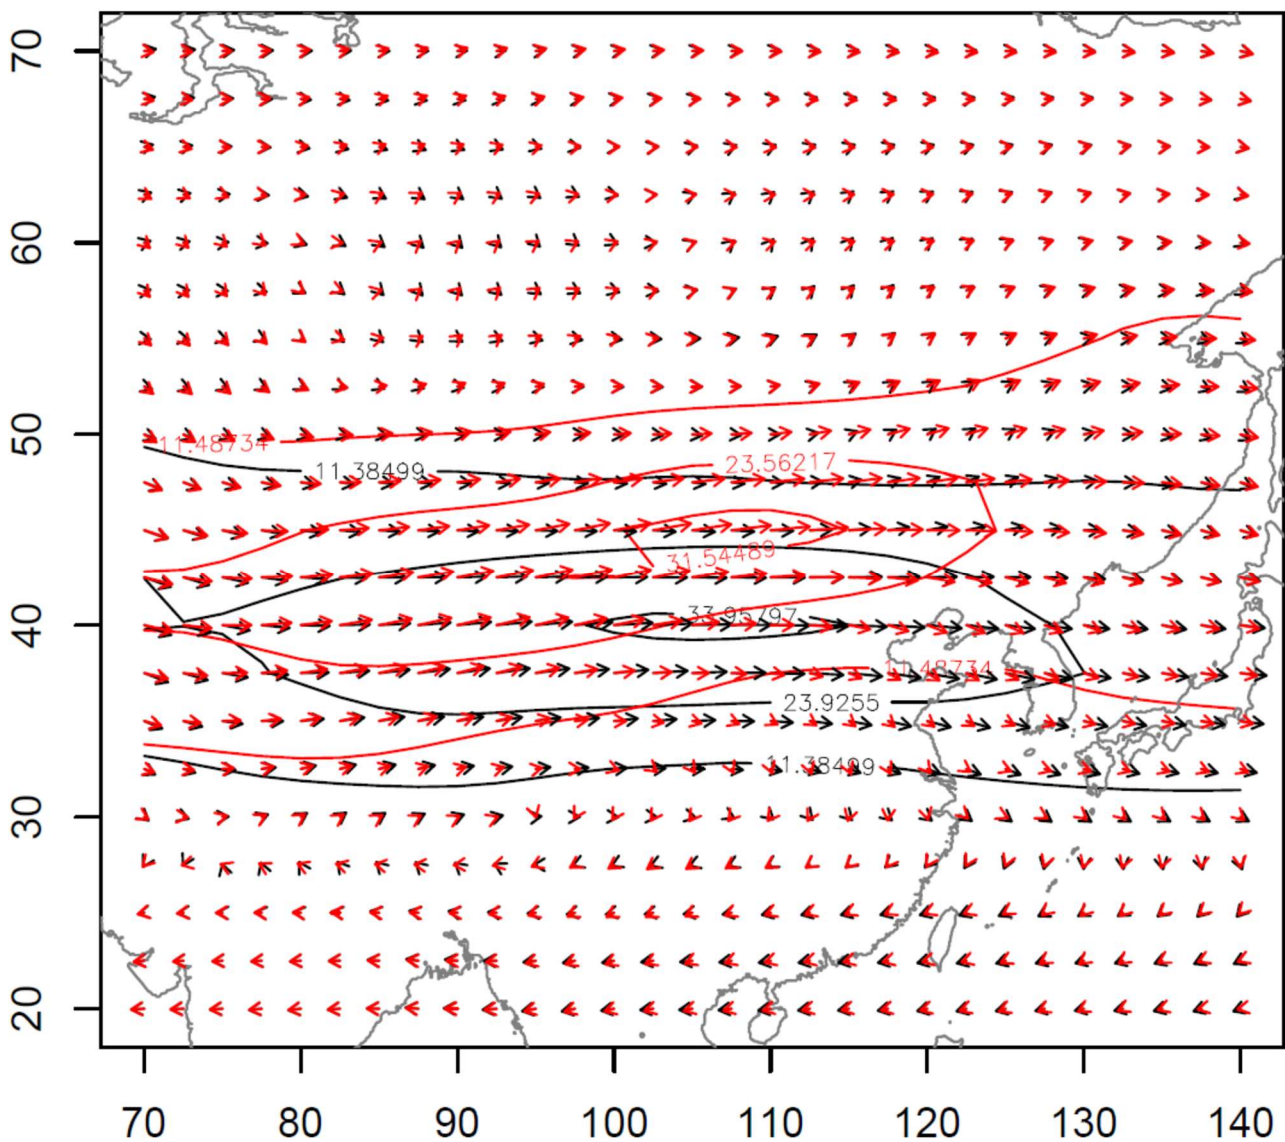

**Supplementary Fig. 1:** Modeled 250 hPa wind (and wind vectors) for 2 ka (black) and 9 ka (red) on the day of the year when the westerly wind stream reached its most northerly position, indicating the position and orientation of the westerly jet stream during the early Holocene compared with the late Holocene.

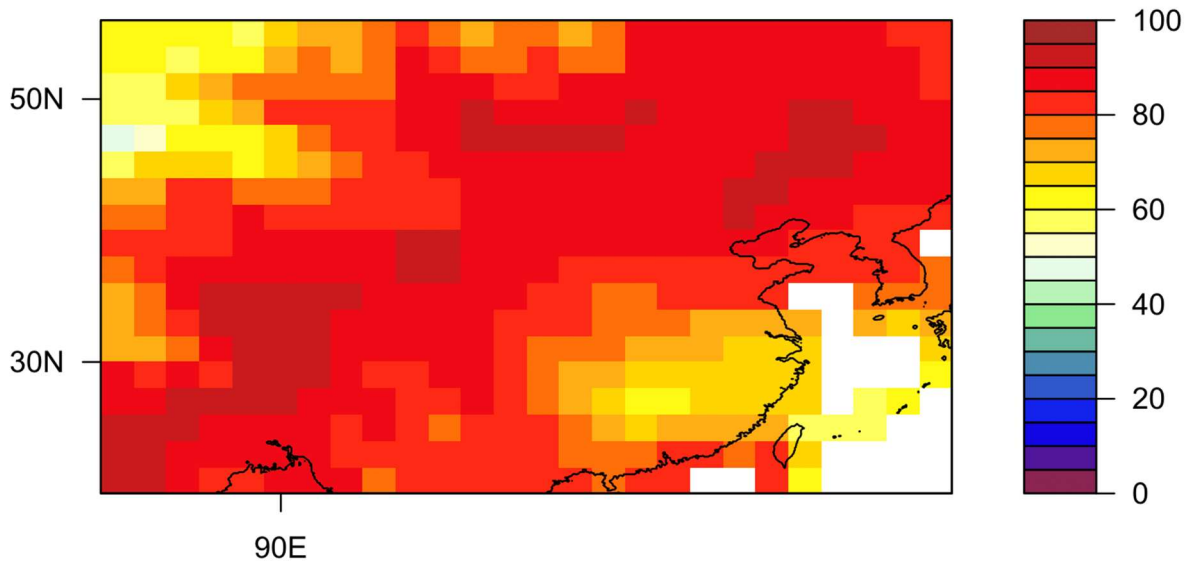

**Supplementary Fig. 2: Percentage of precipitation during summer months (March to September)** as calculated using the APHRODITE dataset (Yatagai et al., 2012). Results indicate that over the whole domain, 80% falls in the summer half year and that the summer contribution at all proxy sites (even in the northwest of the study area) is larger than 60%. (Even with respect to our modeling domain there is only one grid-cell in the northwestern-most part where winter precipitation dominates slightly. Southeastern China has a high share of autumn precipitation originating from to the southward transition of the westerly jet after summer.) Accordingly, we focus our argumentation on circulation mechanisms and related precipitation patterns during the summer (MAMJJAS).

Yatagai, A., Kamiguchi, K., Arakawa, O., Hamada, A., Yasutomi, N., Kito, A., 2012. APHRODITE: Constructing a Long-Term Daily Gridded Precipitation Dataset for Asia Based on a Dense Network of Rain Gauges. *Bulletin of the American Meteorological Society* 93, 1401-1415.

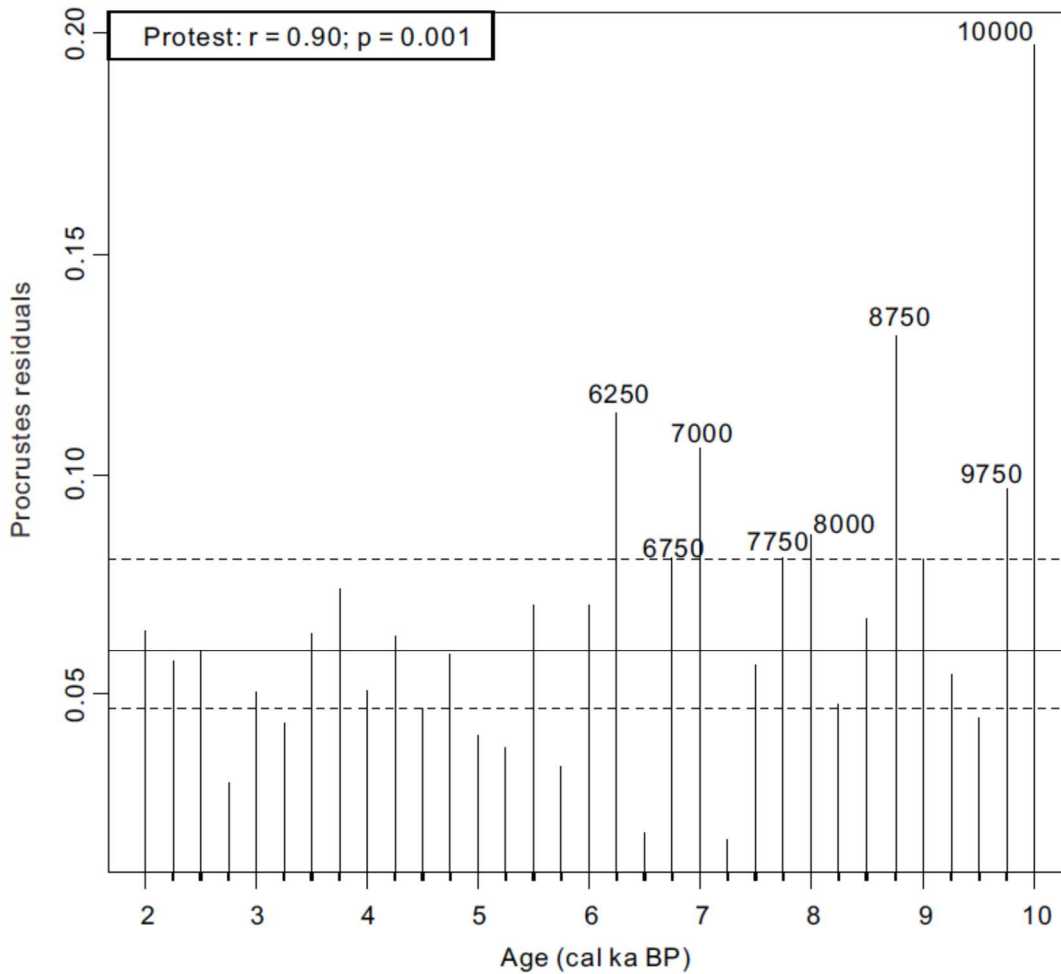

**Supplementary Fig. 3: Comparison of pollen-based and non-pollen-based reconstructions.**

Non-pollen-based climate reconstructions were also available for 82 of the sites in the fossil pollen dataset. We extracted semi-quantitative moisture signals according to Herzschuh (2006) and Wang et al. (2010) from non-pollen proxies, including biological data (e.g. diatoms, ostracods, chironomidae), geochemical data (e.g. organic and inorganic carbon content, stable carbon and oxygen isotope ratios, elemental compositions), and geophysical data (e.g. grain size, magnetic susceptibility; Table 1). We translated the moisture signals at 500-year time intervals for 10–2 ka from these non-pollen studies into moisture signals on a five-part scale (-2, -1, 0, +1, +2), with the lowest value (-2) indicating the driest period for each site and the highest value (+2) indicating the wettest interval; the intermediate value (0) indicated moisture conditions similar to today. The moisture information is therefore on a relative scale and only tracks the changes at each individual site.

Multivariate datasets can be compared using Procrustes rotation, which assesses the overall degree of correlation between two or more ordination results and finds an optimal superimposition that maximizes their fit (Peres-Neto & Jackson, 2001). PROTEST performs a random permutation test and assesses the degree of concordance between two matrices, presenting the significance of the

Procrustes fit as an r-value with an associated p-value to indicate the likelihood of the relationship occurring by chance (Jackson, 1995). In our study we evaluated the similarity/dissimilarity between pollen-based and non-pollen-based inferences of moisture levels, using Procrustes rotation, and then tested the significance of any of the relationships detected using the associated PROTEST permutation test (Peres-Neto & Jackson, 2001) for non-metric multidimensional scaling (NMDS) results, covering the period from 10 to 2 cal. ka BP. The results are shown as residuals, with low residual values indicating a good agreement between datasets and high values indicating a weak agreement. The NMDS, Procrustes, and PROTEST (Peres-Neto & Jackson, 2001) analyses were carried out using the vegan package (Oksanen et al., 2012) in R 3.0.2 software (R Core Team, 2016).

### **References Supplementary Fig. 3**

Herzschuh, U., 2006. Palaeo-moisture evolution at the margins of the Asian monsoon during the last 50 ka. *Quaternary Science Reviews* 25, 163–178.

Jackson, D.A., 1995. PROTEST: A PROcrustean Rendomization TEST of community environment concordance. *Ecoscience* 2, 297-303.

Oksanen, J., Blanchet, F.G., Kindt, R., Legendre, P., Minchin, P.R., O'Hara, R.B., Simpson, G.L., Solymos, P., Stevens, M.H.H., Wagner, H., 2012. *vegan: Community Ecology Package*, version 2.0-4. Available at: <http://cran.r-project.org/web/packages/vegan//index.html>.

Peres-Neto, P.R., Jackson, D.A., 2001. How well do multivariate datasets match? The advantages of a Procrustean superimposition approach over the Mantel test. *Oecologia* 129, 169-178.

R Core Team, 2016. *R: A language and environment for statistical computing*. R Foundation for Statistic Computing, Vienna.

Wang, Y., Liu, X., Herzschuh, U., 2010. Asynchronous evolution of the Indian and East Asian Summer Monsoon indicated by Holocene moisture pattern in monsoonal central Asia. *Earth-Science Reviews* 103, 135-153.



**Supplementary Fig. 4** Correlation of the predicted and observed local climatological daily precipitation. Hashed areas are statistically significant ( $p=0.01$ ).

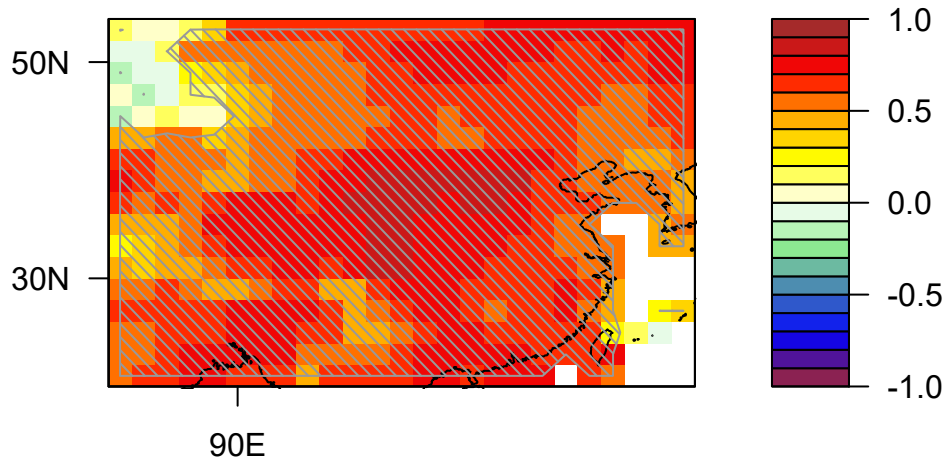

Supplement: MOESM1 [file 41467_2019_9866_MOESM1_ESM.pdf]
